# Supplementary material for: Controlling templating effects at the organic/inorganic interface using (111) oriented copper iodide
Source: Royal Society of Chemistry journal article supplement (doi:10.1039/c4tc00759j), 2014-01-01
Supplement: c4tc00759j1.pdf [file c4tc00759j1.pdf]

**SI01 - XRD of non-templated FePc**

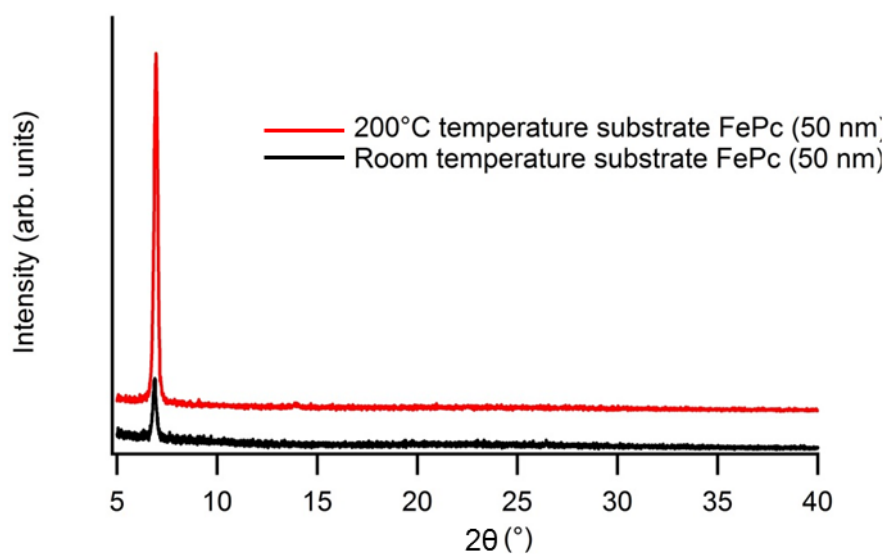

**Figure SI01** –XRD traces for 50 nm FePc at room temperature and 200°C substrate growth conditions

**SI02 – Surface roughness vs FePc thickness**

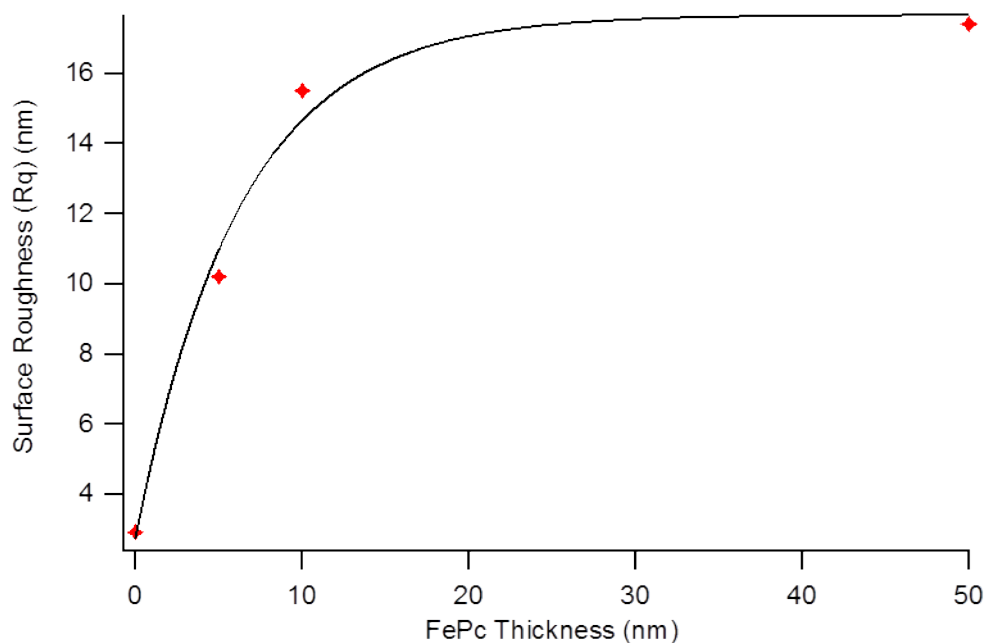

**Figure SI02** – Surface roughness vs. FePc thickness (red points) - an exponential fit (black line) is included as a guide for the eye

### SI03 – Expanded high angle XRD

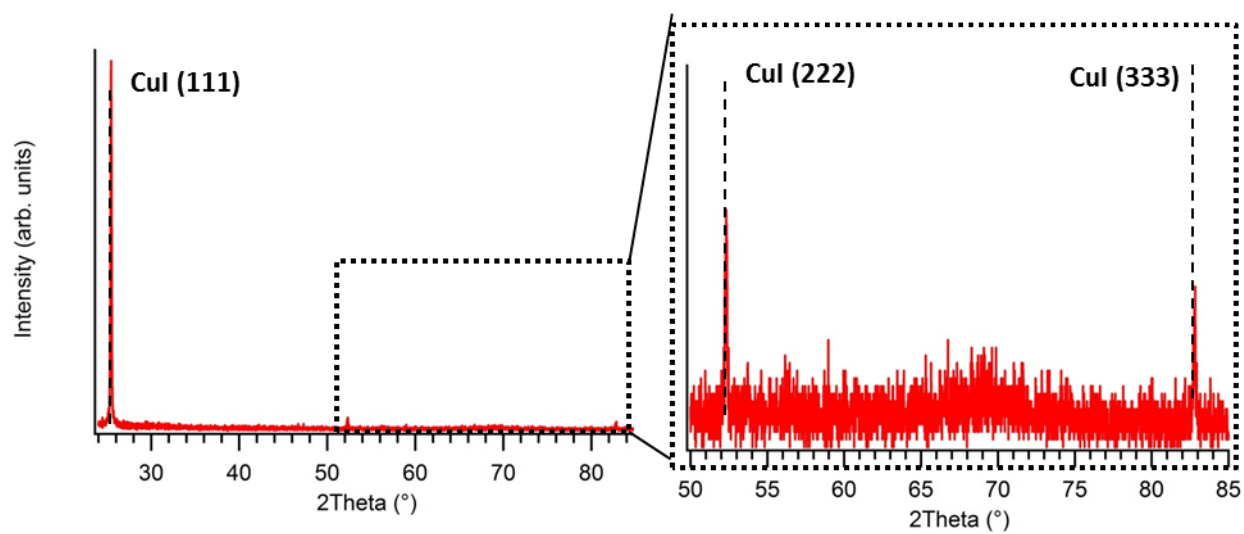

Figure SI03 – Expanded higher-angle XRD

### SI04 - Crystal Structure of FePc

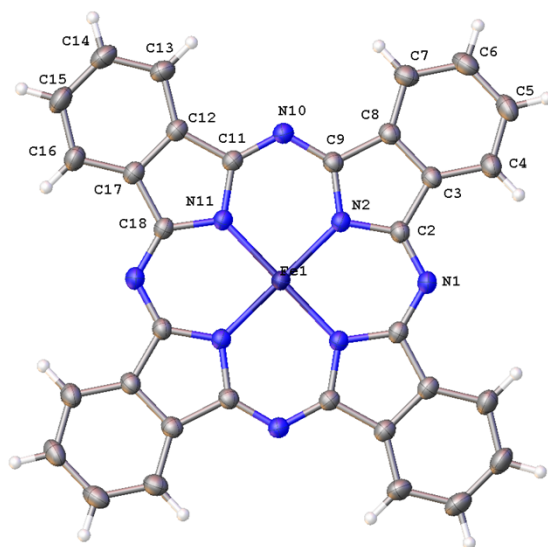

Solid state structure of FePc test\_3 with only the asymmetric unit of the structure labeled. Atoms are drawn at 50% probability. The molecule lies on an inversion centre at Fe1

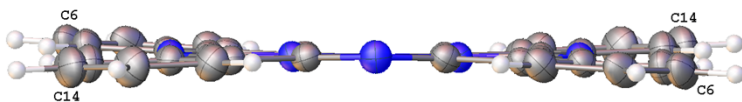

Picture looking along the plane of the PC core through N1-Fe1-N1 to highlight how the phenyl ring C12-C17 (labeled with a C14) lies much more above and below the plane of the PC core compared to phenyl C3-C8

The asymmetric unit contains half a PC core with Fe1 lying on an inversion centre on special position 2a

The Pc ring is not perfectly flat but ring C12-C17 lies above and below the Pc core. This is highlighted by the data below where the first 9 atoms (the Fe and the nitrogens) define a mean plane and the other atoms show their deviation from this plane

```
* 0.0000 (0.0000) Fe1
* -0.0057 (0.0006) N1
* 0.0069 (0.0010) N2
* 0.0001 (0.0006) N10
* -0.0071 (0.0010) N11
* 0.0057 (0.0006) N1_$3
* -0.0069 (0.0010) N2_$3
* -0.0001 (0.0006) N10_$3
* 0.0071 (0.0010) N11_$3
0.1812 (0.0028) C5
0.1913 (0.0028) C6
-0.1968 (0.0030) C14
-0.1817 (0.0029) C15
```

The packing has an off set pi stack with symmetry related Pc rings that travels along the c axis of the cell shown below (using Mercury)

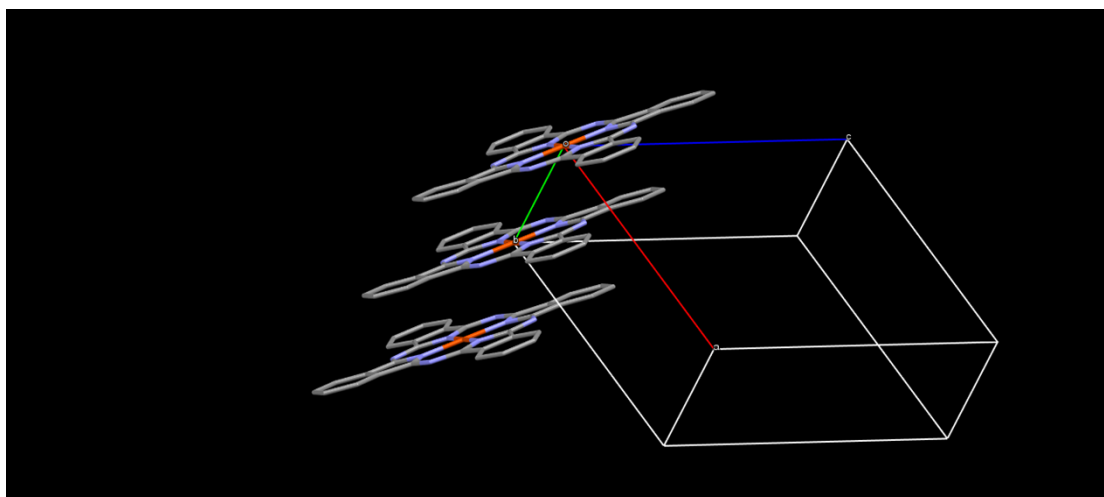

Closest atomic contact between these stacked Pcs is

3.2394 (0.0013) Fe1 - N1\_\$1  
 3.3274 (0.0021) C9 - C4\_\$1

These infinite stacks have a herring bone arrangement with a neighbouring stack shown below

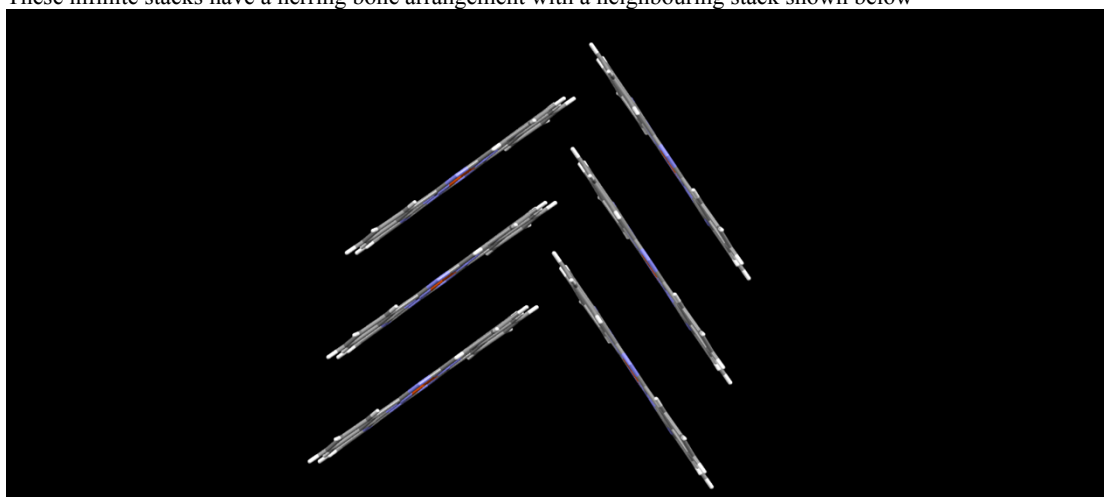

The atoms used to define the mean planes through the interacting systems and the angle between them was Fe1 C2 C4 C6 C8 C12 C14 C16 C18 to Fe1\_\$2 C2\_\$2 C4\_\$2 C6\_\$2 C8\_\$2 C12\_\$2 C14\_\$2 C16\_\$2 C18\_\$2 88.319 ( 0.016 ) degrees

There is also a slightly different orientation where another symmetry related stack is orthogonal to the original stack. This interaction is characterized by one of the phenyl rings (C12-C17) poking into the bay area (C7-N10\_C13) of symmetry related Pc ring shown below

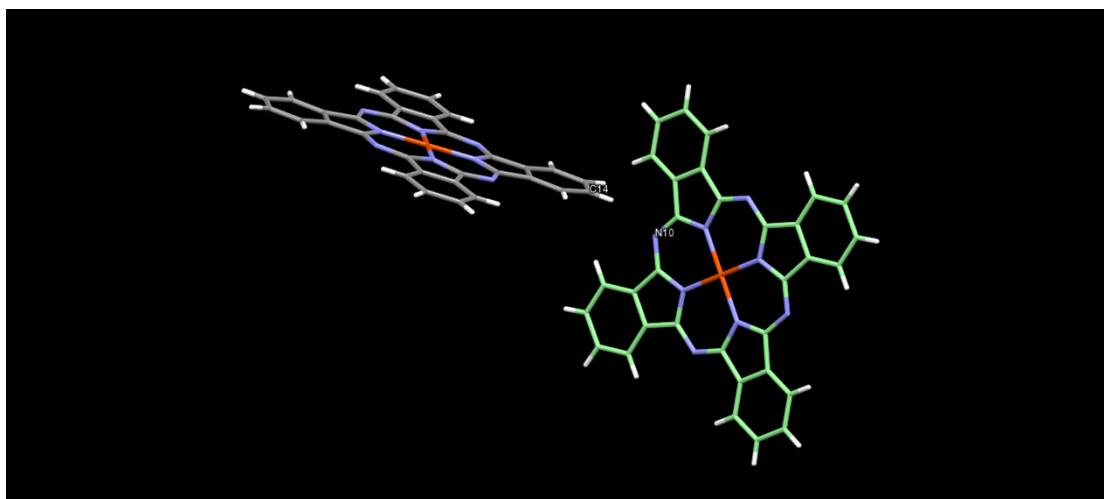

The two interactions are shown together below. Orange Pcs with green is the herring bone style interaction. Green with grey Pcs is the alternative interaction. The grey and the orange Pcs are related by glide planes. The green stack is related by a 2(1) screw axis to the other two stacks.

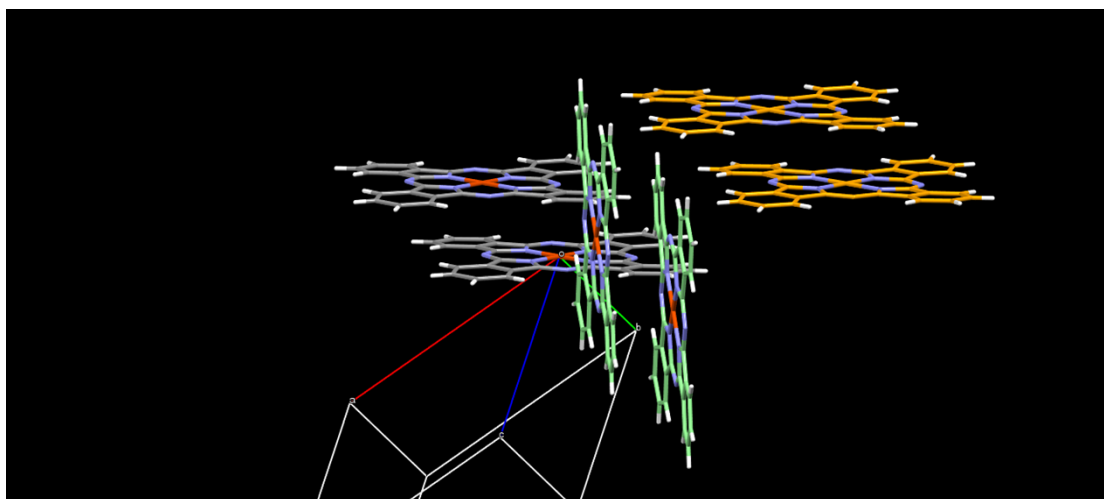

The angle between means planes through these stacks is

Fe1 C2 C4 C6 C8 C12 C14 C16 C18 to Fe1\_2 C2\_2 C4\_2 C6\_2 C8\_2 C12\_2 C14\_2 C16\_2 C18\_2 is 88.319 ( 0.016 ) degrees (it's the same angle for mean planes from orange to green and from green to grey as the orange and grey stacks are related by a translation)

Symmetry operators used to define symmetry related atoms in above discussion are

\$1 +X,1+Y,+Z  
 \$2 0.5-X,0.5+Y,0.5-Z  
 \$3 -X,-Y,-Z

#### Experimental

Single crystals of  $C_{32}H_{16}FeN_8$  [Fe-Pc\_test3] were grown by sublimation. A suitable crystal was selected and mounted on a Mitigen loop with silicon oil on an Oxford Diffraction Xcalibur Gemini diffractometer with a Ruby CCD area detector. The crystal was kept at 293(2) K during data collection. Using Olex2 [1], the structure was solved with the ShelXS [2] structure solution program using Direct Methods and refined with the ShelXL [3] refinement package using Least Squares minimisation.

1. Dolomanov, O.V., Bourhis, L.J., Gildea, R.J, Howard, J.A.K. & Puschmann, H. (2009), J. Appl. Cryst. 42, 339-

2. Sheldrick, G.M. (2008). Acta Cryst. A64, 112-122
  3. Sheldrick, G.M. (2008). Acta Cryst. A64, 112-122
- Crystal structure determination of [Fe-Pc\_test3]

**Crystal Data** for  $C_{32}H_{16}FeN_8$  ( $M=568.38$ ): monoclinic, space group  $P2_1/n$  (no. 14),  $a = 14.6133(4)$  Å,  $b = 4.78734(11)$  Å,  $c = 17.2977(4)$  Å,  $\beta = 105.582(3)^\circ$ ,  $V = 1165.65(6)$  Å<sup>3</sup>,  $Z = 2$ ,  $T = 293(2)$  K,  $\mu(\text{MoK}\alpha) = 0.691$  mm<sup>-1</sup>,  $D_{\text{calc}} = 1.619$  g/mm<sup>3</sup>, 13513 reflections measured ( $6.498 \leq 2\theta \leq 75.18$ ), 5517 unique ( $R_{\text{int}} = 0.0325$ ,  $R_{\text{sigma}} = 0.0432$ ) which were used in all calculations. The final  $R_1$  was 0.0513 ( $I > 2\sigma(I)$ ) and  $wR_2$  was 0.1227 (all data).

#### Refinement model description

Number of restraints - 0, number of constraints - unknown.

#### Details:

##### 1. Fixed Uiso

At 1.2 times of:

All C(H) groups

2.a Aromatic/amide H refined with riding coordinates:

C4 (H4), C5 (H5), C6 (H6), C7 (H7), C13 (H13), C14 (H14), C15 (H15), C16 (H16)

This report has been created with Olex2, compiled on 2013.11.15 svn.r2839 for OlexSys. Please [let us know](#) if there are any errors or if you would like to have additional features.

Table 2 Fractional Atomic Coordinates ( $\times 10^4$ ) and Equivalent Isotropic Displacement Parameters (Å<sup>2</sup> $\times 10^3$ ) for Fe-Pc\_test3.  $U_{\text{eq}}$  is defined as 1/3 of the trace of the orthogonalised  $U_{ij}$  tensor.

| Atom | x           | y        | z          | U(eq)    |
|------|-------------|----------|------------|----------|
| Fe1  | 0           | 0        | 0          | 22.82(8) |
| N1   | 1512.4(9)   | -5160(2) | 788.2(8)   | 27.7(2)  |
| C2   | 916.1(10)   | -4247(3) | 1188.1(8)  | 25.5(3)  |
| N2   | 242.0(9)    | -2183(2) | 969.1(7)   | 24.3(2)  |
| C3   | 913.9(11)   | -5364(3) | 1968.4(9)  | 26.3(3)  |
| C4   | 1469.5(11)  | -7402(3) | 2443.1(9)  | 32.8(3)  |
| C5   | 1297.4(12)  | -7953(4) | 3178.5(10) | 37.4(4)  |
| C6   | 592.1(12)   | -6529(4) | 3424.4(9)  | 38.2(4)  |
| C7   | 33.6(13)    | -4513(4) | 2947.5(10) | 34.4(3)  |
| C8   | 206.6(11)   | -3933(3) | 2210.6(8)  | 27.2(3)  |
| C9   | -209.3(10)  | -1966(3) | 1573.8(8)  | 25.4(3)  |
| N10  | -919.6(9)   | -283(2)  | 1601.3(7)  | 27.0(2)  |
| C11  | -1277.9(10) | 1507(3)  | 1013.8(8)  | 25.0(3)  |
| N11  | -986.9(9)   | 1954(2)  | 327.2(7)   | 24.2(2)  |
| C12  | -2065.2(11) | 3356(3)  | 1017.2(9)  | 27.6(3)  |
| C13  | -2618.3(12) | 3699(4)  | 1554.2(10) | 35.5(3)  |
| C14  | -3342.4(13) | 5668(4)  | 1361.7(11) | 41.4(4)  |
| C15  | -3501.4(13) | 7265(4)  | 663.1(11)  | 41.1(4)  |
| C16  | -2949.9(12) | 6952(3)  | 131.4(10)  | 34.3(3)  |
| C17  | -2230.9(11) | 4952(3)  | 321.4(9)   | 27.5(3)  |
| C18  | -1543.8(10) | 4051(3)  | -94.8(8)   | 25.2(3)  |

Table 3 Anisotropic Displacement Parameters (Å<sup>2</sup> $\times 10^3$ ) for Fe-Pc\_test3. The Anisotropic displacement exponent takes the form:  $-2\pi^2[h^2a^2U_{11}+2hka*b*U_{12}+\dots]$

| Atom | U <sub>11</sub> | U <sub>22</sub> | U <sub>33</sub> | U <sub>23</sub> | U <sub>13</sub> | U <sub>12</sub> |
|------|-----------------|-----------------|-----------------|-----------------|-----------------|-----------------|
| Fe1  | 22.82(15)       | 22.47(13)       | 23.75(13)       | 1.70(9)         | 7.25(10)        | 2.61(10)        |
| N1   | 25.9(6)         | 28.1(6)         | 28.4(5)         | 3.4(4)          | 6.3(5)          | 5.1(5)          |
| C2   | 23.5(7)         | 25.7(6)         | 25.8(6)         | 2.1(5)          | 4.4(5)          | 0.9(5)          |
| N2   | 23.3(6)         | 24.2(5)         | 25.6(5)         | 0.7(4)          | 6.7(4)          | 1.4(4)          |
| C3   | 23.3(7)         | 27.4(6)         | 27.1(6)         | 3.8(5)          | 4.8(5)          | -1.1(5)         |

|     |         |         |         |         |         |         |
|-----|---------|---------|---------|---------|---------|---------|
| C4  | 27.4(7) | 34.3(7) | 35.0(7) | 8.6(6)  | 5.3(6)  | 1.9(6)  |
| C5  | 31.7(8) | 39.9(8) | 36.0(7) | 14.6(7) | 1.2(7)  | -1.0(7) |
| C6  | 37.3(9) | 46.9(9) | 29.9(7) | 10.6(7) | 8.0(6)  | -5.5(7) |
| C7  | 35.7(9) | 38.5(8) | 31.2(7) | 5.3(6)  | 12.5(7) | -1.0(6) |
| C8  | 25.8(7) | 28.1(6) | 27.8(6) | 2.6(5)  | 7.1(5)  | -2.3(5) |
| C9  | 24.8(7) | 24.8(6) | 26.4(6) | 2.0(5)  | 6.6(5)  | -1.1(5) |
| N10 | 26.6(6) | 28.0(6) | 27.4(5) | 1.8(4)  | 9.3(5)  | 1.5(5)  |
| C11 | 23.5(6) | 25.3(6) | 26.6(6) | -1.5(5) | 7.7(5)  | 0.0(5)  |
| N11 | 23.5(6) | 23.7(5) | 25.8(5) | 0.9(4)  | 7.0(4)  | 2.0(4)  |
| C12 | 26.1(7) | 27.7(6) | 29.9(6) | -2.0(5) | 8.8(5)  | 1.1(5)  |
| C13 | 36.5(9) | 38.7(8) | 35.8(7) | -1.0(6) | 17.5(7) | 4.0(7)  |
| C14 | 37.1(9) | 46.6(9) | 46.1(9) | -5.1(8) | 20.8(8) | 7.1(8)  |
| C15 | 35.0(9) | 42.5(9) | 47.8(9) | -3.1(7) | 14.6(8) | 13.3(7) |
| C16 | 32.3(8) | 34.6(8) | 36.0(7) | -0.5(6) | 9.4(6)  | 8.9(6)  |
| C17 | 25.0(7) | 27.7(6) | 29.6(6) | -3.3(5) | 7.1(5)  | 1.1(5)  |
| C18 | 22.7(7) | 25.3(6) | 27.0(6) | -1.2(5) | 5.5(5)  | 1.7(5)  |

Table 4 Bond Lengths for Fe-Pc\_test3.

| Atom | Atom             | Length/Å   | Atom | Atom            | Length/Å   |
|------|------------------|------------|------|-----------------|------------|
| Fe1  | N2 <sup>1</sup>  | 1.9259(11) | C8   | C9              | 1.453(2)   |
| Fe1  | N2               | 1.9259(11) | C9   | N10             | 1.3247(18) |
| Fe1  | N11 <sup>1</sup> | 1.9271(11) | N10  | C11             | 1.3251(18) |
| Fe1  | N11              | 1.9271(11) | C11  | N11             | 1.3815(17) |
| N1   | C2               | 1.3239(18) | C11  | C12             | 1.453(2)   |
| N1   | C18 <sup>1</sup> | 1.3234(18) | N11  | C18             | 1.3727(18) |
| C2   | N2               | 1.3747(18) | C12  | C13             | 1.395(2)   |
| C2   | C3               | 1.4525(19) | C12  | C17             | 1.391(2)   |
| N2   | C9               | 1.3823(17) | C13  | C14             | 1.389(3)   |
| C3   | C4               | 1.388(2)   | C14  | C15             | 1.396(3)   |
| C3   | C8               | 1.395(2)   | C15  | C16             | 1.384(2)   |
| C4   | C5               | 1.387(2)   | C16  | C17             | 1.394(2)   |
| C5   | C6               | 1.394(3)   | C17  | C18             | 1.4493(19) |
| C6   | C7               | 1.384(2)   | C18  | N1 <sup>1</sup> | 1.3235(18) |
| C7   | C8               | 1.393(2)   |      |                 |            |

<sup>1</sup>-X,-Y,-Z

Table 5 Bond Angles for Fe-Pc\_test3.

| Atom             | Atom | Atom             | Angle/°    | Atom            | Atom | Atom | Angle/°    |
|------------------|------|------------------|------------|-----------------|------|------|------------|
| N2 <sup>1</sup>  | Fe1  | N2               | 180.00(9)  | N2              | C9   | C8   | 109.72(12) |
| N2 <sup>1</sup>  | Fe1  | N11 <sup>1</sup> | 89.12(5)   | N10             | C9   | N2   | 127.64(13) |
| N2               | Fe1  | N11 <sup>1</sup> | 90.88(5)   | N10             | C9   | C8   | 122.64(13) |
| N2 <sup>1</sup>  | Fe1  | N11              | 90.88(5)   | C9              | N10  | C11  | 121.19(12) |
| N2               | Fe1  | N11              | 89.12(5)   | N10             | C11  | N11  | 127.59(13) |
| N11 <sup>1</sup> | Fe1  | N11              | 180.00(9)  | N10             | C11  | C12  | 122.78(12) |
| C18 <sup>1</sup> | N1   | C2               | 121.96(13) | N11             | C11  | C12  | 109.64(12) |
| N1               | C2   | N2               | 128.07(12) | C11             | N11  | Fe1  | 127.22(10) |
| N1               | C2   | C3               | 122.02(13) | C18             | N11  | Fe1  | 125.62(9)  |
| N2               | C2   | C3               | 109.90(12) | C18             | N11  | C11  | 107.16(11) |
| C2               | N2   | Fe1              | 125.49(9)  | C13             | C12  | C11  | 132.47(14) |
| C2               | N2   | C9               | 107.32(11) | C17             | C12  | C11  | 106.57(12) |
| C9               | N2   | Fe1              | 127.19(10) | C17             | C12  | C13  | 120.96(14) |
| C4               | C3   | C2               | 131.40(14) | C14             | C13  | C12  | 117.40(15) |
| C4               | C3   | C8               | 122.03(13) | C13             | C14  | C15  | 121.22(15) |
| C8               | C3   | C2               | 106.56(12) | C16             | C15  | C14  | 121.64(16) |
| C5               | C4   | C3               | 117.06(15) | C15             | C16  | C17  | 117.03(15) |
| C4               | C5   | C6               | 121.20(15) | C12             | C17  | C16  | 121.75(14) |
| C7               | C6   | C5               | 121.67(15) | C12             | C17  | C18  | 106.48(13) |
| C6               | C7   | C8               | 117.49(16) | C16             | C17  | C18  | 131.77(14) |
| C3               | C8   | C9               | 106.48(12) | N1 <sup>1</sup> | C18  | N11  | 127.97(13) |
| C7               | C8   | C3               | 120.55(14) | N1 <sup>1</sup> | C18  | C17  | 121.88(13) |
| C7               | C8   | C9               | 132.96(15) | N11             | C18  | C17  | 110.14(12) |

<sup>1</sup>-X,-Y,-Z

Table 6 Torsion Angles for Fe-Pc\_test3.

| A   | B   | C   | D               | Angle/°     | A                | B   | C   | D               | Angle/°     |
|-----|-----|-----|-----------------|-------------|------------------|-----|-----|-----------------|-------------|
| Fe1 | N2  | C9  | C8              | -178.10(10) | C8               | C9  | N10 | C11             | 179.37(14)  |
| Fe1 | N2  | C9  | N10             | 2.4(2)      | C9               | N10 | C11 | N11             | -1.4(2)     |
| Fe1 | N11 | C18 | N1 <sup>1</sup> | -0.9(2)     | C9               | N10 | C11 | C12             | 179.10(13)  |
| Fe1 | N11 | C18 | C17             | 177.94(10)  | N10              | C11 | N11 | Fe1             | 2.5(2)      |
| N1  | C2  | N2  | Fe1             | -0.9(2)     | N10              | C11 | N11 | C18             | -178.29(14) |
| N1  | C2  | N2  | C9              | 179.89(14)  | N10              | C11 | C12 | C13             | -1.8(3)     |
| N1  | C2  | C3  | C4              | 0.6(3)      | N10              | C11 | C12 | C17             | 178.79(14)  |
| N1  | C2  | C3  | C8              | 179.78(14)  | C11              | N11 | C18 | N1 <sup>1</sup> | 179.88(15)  |
| C2  | N2  | C9  | C8              | 1.14(16)    | C11              | N11 | C18 | C17             | -1.28(16)   |
| C2  | N2  | C9  | N10             | -178.36(14) | C11              | C12 | C13 | C14             | -178.77(17) |
| C2  | C3  | C4  | C5              | 178.64(16)  | C11              | C12 | C17 | C16             | 179.62(14)  |
| C2  | C3  | C8  | C7              | -179.30(15) | C11              | C12 | C17 | C18             | 0.04(16)    |
| C2  | C3  | C8  | C9              | -0.06(16)   | N11              | C11 | C12 | C13             | 178.61(16)  |
| N2  | C2  | C3  | C4              | -178.43(15) | N11              | C11 | C12 | C17             | -0.83(16)   |
| N2  | C2  | C3  | C8              | 0.77(17)    | C12              | C11 | N11 | Fe1             | -177.90(9)  |
| N2  | C9  | N10 | C11             | -1.2(2)     | C12              | C11 | N11 | C18             | 1.30(16)    |
| C3  | C2  | N2  | Fe1             | 178.08(10)  | C12              | C13 | C14 | C15             | -0.8(3)     |
| C3  | C2  | N2  | C9              | -1.18(16)   | C12              | C17 | C18 | N1 <sup>1</sup> | 179.69(14)  |
| C3  | C4  | C5  | C6              | 0.4(2)      | C12              | C17 | C18 | N11             | 0.77(16)    |
| C3  | C8  | C9  | N2              | -0.66(16)   | C13              | C12 | C17 | C16             | 0.1(2)      |
| C3  | C8  | C9  | N10             | 178.87(13)  | C13              | C12 | C17 | C18             | -179.48(14) |
| C4  | C3  | C8  | C7              | 0.0(2)      | C13              | C14 | C15 | C16             | 0.3(3)      |
| C4  | C3  | C8  | C9              | 179.23(14)  | C14              | C15 | C16 | C17             | 0.4(3)      |
| C4  | C5  | C6  | C7              | 0.1(3)      | C15              | C16 | C17 | C12             | -0.6(2)     |
| C5  | C6  | C7  | C8              | -0.5(3)     | C15              | C16 | C17 | C18             | 178.84(16)  |
| C6  | C7  | C8  | C3              | 0.5(2)      | C16              | C17 | C18 | N1 <sup>1</sup> | 0.2(3)      |
| C6  | C7  | C8  | C9              | -178.50(16) | C16              | C17 | C18 | N11             | -178.75(16) |
| C7  | C8  | C9  | N2              | 178.44(17)  | C17              | C12 | C13 | C14             | 0.6(2)      |
| C7  | C8  | C9  | N10             | -2.0(3)     | C18 <sup>1</sup> | N1  | C2  | N2              | 2.0(2)      |
| C8  | C3  | C4  | C5              | -0.5(2)     | C18 <sup>1</sup> | N1  | C2  | C3              | -176.79(14) |

<sup>1</sup>-X,-Y,-ZTable 7 Hydrogen Atom Coordinates ( $\text{\AA} \times 10^4$ ) and Isotropic Displacement Parameters ( $\text{\AA}^2 \times 10^3$ ) for Fe-Pc\_test3.

| Atom | x     | y     | z    | U(eq) |
|------|-------|-------|------|-------|
| H4   | 1937  | -8355 | 2275 | 39    |
| H5   | 1659  | -9297 | 3514 | 45    |
| H6   | 494   | -6944 | 3921 | 46    |
| H7   | -439  | -3582 | 3113 | 41    |
| H13  | -2507 | 2649  | 2023 | 43    |
| H14  | -3728 | 5928  | 1705 | 50    |
| H15  | -3990 | 8573  | 552  | 49    |
| H16  | -3055 | 8027  | -332 | 41    |

This report has been created with Olex2, compiled on 2013.11.15 svn.r2839 for OlexSys.
